# Supplementary material for: Genome Scans for Selection and Introgression based on k-nearest Neighbor Techniques
Source: bioRxiv or medRxiv preprint supplement (doi:10.1101/752758), 2019-09-28
Supplement: Supplementary file [file media-1.pdf]

# Supplementary Material

Genome Scans for Selection and Introgression based on  $k$ -  
Nearest Neighbor Techniques

Bastian Pfeifer, Nikolaos Alachiotis, Pavlos Pavlidis, Michael G. Schimek

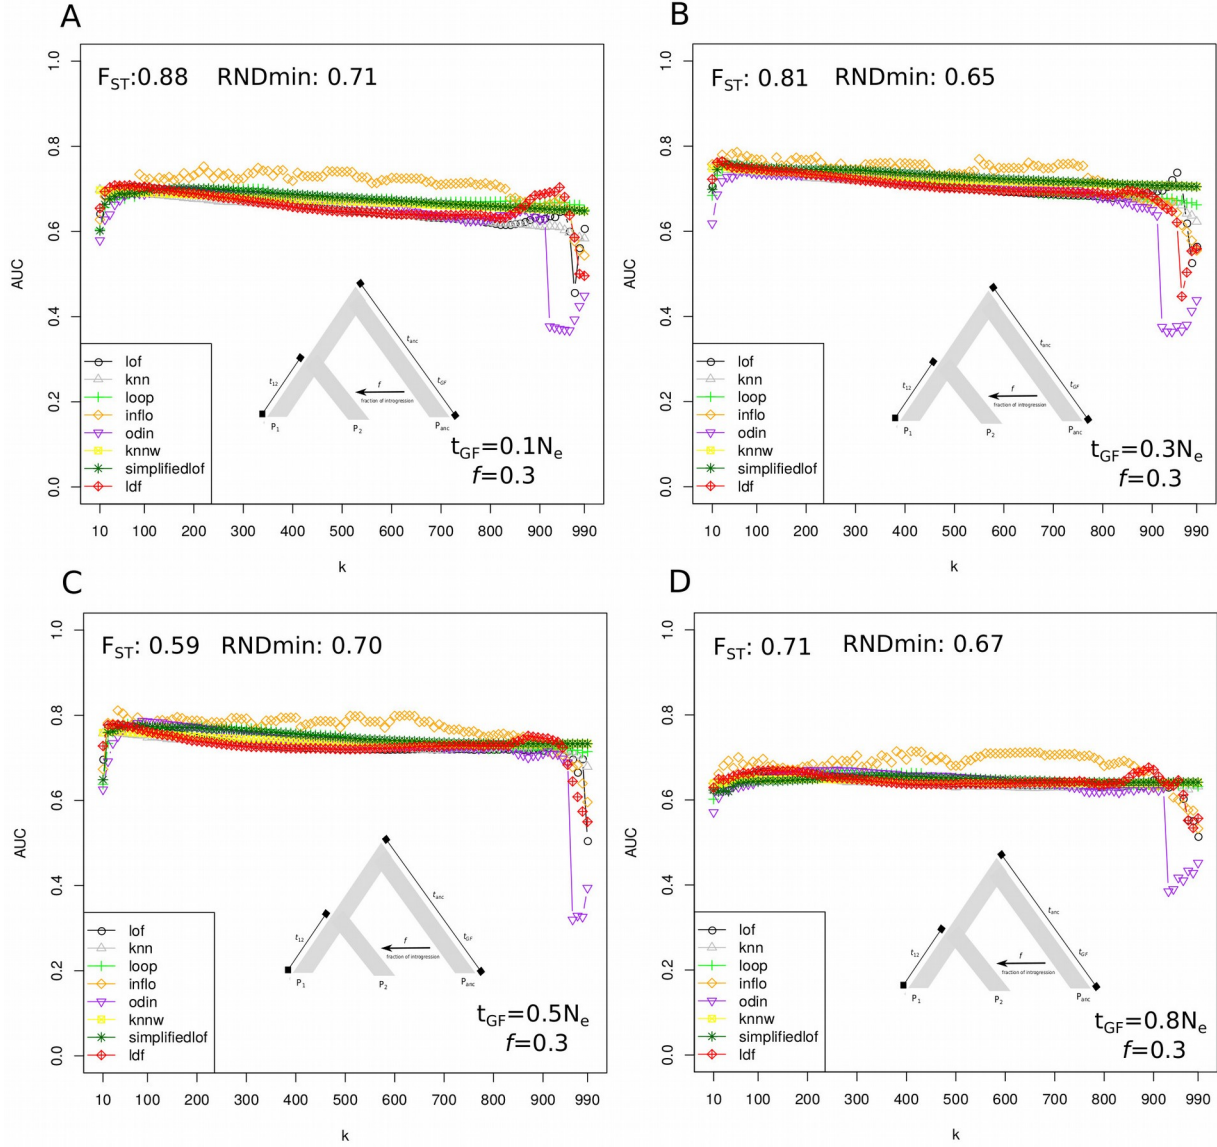

**Supplementary Figure S1: Introgression. Varying the time of gene-flow ( $t_{GF}$ ) and using  $d_{xy}$  as features.** The results for the  $k$ NN-based methods using  $d_{xy}$  as features shown for 100 sequentially sampled  $k$ 's ( $k=[1, 10, \dots, 990, 1000]$ ). The coalescent times are  $t_{12}=1N_e$  and  $t_{anc}=2N_e$  generations ago. Recombination rate is set to  $r=0.01$  in all simulations. The outcome of the  $k$ NN-based methods are compared to  $F_{ST}$  and  $RNDmin$ . The time of gene-flow is set to **A.**  $t_{GF}=0.1N_e$  **B.**  $t_{GF}=0.3N_e$  **C.**  $t_{GF}=0.5N_e$  and **D.**  $t_{GF}=0.8N_e$  generations ago.

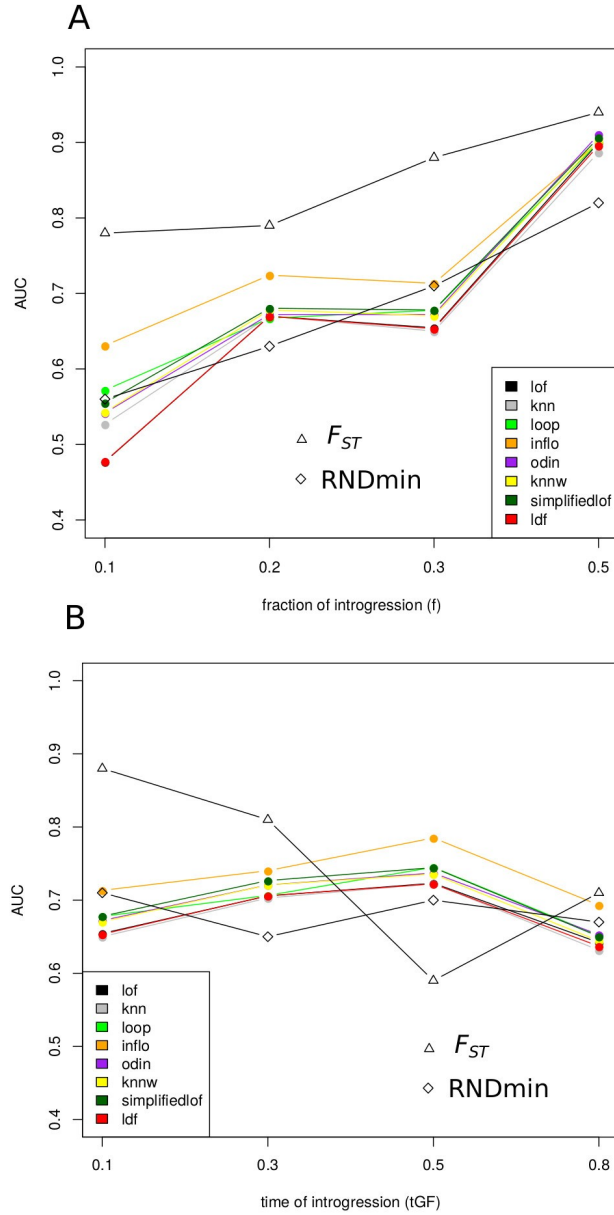

**Supplementary Figure S2: Detecting introgression with a computed  $k$  and using  $d_{xy}$  as features.** The accuracy of the  $kNN$ -methods using  $d_{xy}$  as features compared to  $F_{ST}$  and  $RNDmin$ . Recombination rate is set to  $r=0.01$  in all simulations. **A.** Varying the fraction of introgression ( $f=[0.1, 0.2, 0.3, 0.5]$ ) **B.** Varying the time of gene-flow ( $t_{GF}=[0.1, 0.3, 0.5, 0.8]$ ).
